# Supplementary material for: Der Titelrekognitionstest für das Vorschulalter (TRT-VS)
Source: Atypon-hosted journal article supplement (doi:10.1026/0012-1924/a000186), 2017-09-05
Supplement: 0012-1924_a000186_esm1.pdf [file 0012-1924_a000186_esm1.pdf]

*Elektronisches Supplement 1.* Titel, Erscheinungsjahr, Verkaufsrank und Preis der Bücher im TRT-VS. Verteilung der Titel (T) und Distraktor-Titel (DT) auf die Versionen A und B sowie Hit- und False-Alarm-Raten in Studie 1 (Kinder und Erwachsene) und Studie 2 (Kinder)

| Titel                                               | Jahr | Rang <sup>a</sup> | Preis <sup>b</sup> | Version |    | Studie 1 |      | Studie 2 |      |  |
|-----------------------------------------------------|------|-------------------|--------------------|---------|----|----------|------|----------|------|--|
|                                                     |      |                   |                    | A       | B  | A        | B    | A        | B    |  |
| <i>Set 1</i>                                        |      |                   |                    |         |    |          |      |          |      |  |
| T: Der Grüffelo                                     | 1999 | 102               | 8.95               | T       | T  | 0.73     | 0.63 | 0.78     | 0.81 |  |
| T: Der kleine Drache Kokosnuss                      | 2002 | 1 045             | 14.99              | T       | T  | 0.59     | 0.49 | 0.90     | 0.94 |  |
| T: Die kleine Prinzessin                            | 1994 | 34 124            | 9.95               | T       | T  | 0.34     | 0.29 | 0.37     | 0.37 |  |
| T: Die kleine Raupe Nimmersatt                      | 1969 | 137               | 6.95               | T       | T  | 0.86     | 0.94 | 0.88     | 0.91 |  |
| T: Die Olchis                                       | 1990 | 2 987             | 12.00              | T       | T  | 0.50     | 0.49 | 0.60     | 0.73 |  |
| T: Jim Knopf und Lukas der Lokomotivführer          | 1960 | 5 437             | 14.99              | T       | T  | 0.75     | 0.94 | 0.57     | 0.59 |  |
| T: Lieselotte                                       | 2006 | 3 514             | 5.90               | T       | T  | 0.13     | 0.11 | 0.29     | 0.31 |  |
| T: Petterson und Findus                             | 1984 | 604               | 12.95              | T       | T  | 0.93     | 0.89 | 0.90     | 0.91 |  |
| T: Prinzessin Lillifee                              | 2004 | 2 116             | 4.95               | T       | T  | 0.80     | 0.94 | 0.68     | 0.73 |  |
| T: Weißt du eigentlich, wie lieb ich dich hab?      | 1990 | 13 927            | 5.95               | T       | T  | 0.45     | 0.40 | 0.36     | 0.38 |  |
| <i>Set 2</i>                                        |      |                   |                    |         |    |          |      |          |      |  |
| T: Bobo Siebenschläfer                              | 1986 | 4 599             | 5.99               | T       | DT | 0.23     | 0.08 | 0.37     | 0.19 |  |
| DT: Sepp Schlafnase                                 |      |                   |                    |         |    |          |      |          |      |  |
| T: Briefe von Felix: Ein kleiner Hase auf Weltreise | 1994 | 6 967             | 12.95              | T       | DT | 0.63     | 0.03 | 0.51     | 0.19 |  |
| DT: Karte von Max                                   |      |                   |                    |         |    |          |      |          |      |  |
| T: Conni                                            | 1992 | 205               | 3.99               | T       | DT | 0.59     | 0.03 | 0.90     | 0.17 |  |
| DT: Kahira                                          |      |                   |                    |         |    |          |      |          |      |  |
| T: Der kleine Rabe Socke                            | 1996 | 2 513             | 14.95              | T       | DT | 0.61     | 0.11 | 0.79     | 0.24 |  |
| DT: Der große Dino Domino                           |      |                   |                    |         |    |          |      |          |      |  |
| T: Der Regenbogenfisch                              | 1992 | 2 664             | 15.95              | T       | DT | 0.59     | 0.11 | 0.62     | 0.24 |  |
| DT: Die bunte Katze                                 |      |                   |                    |         |    |          |      |          |      |  |
| T: Die kleine Motzkuh                               | 2000 | 3 335             | 10.00              | T       | DT | 0.11     | 0.06 | 0.18     | 0.24 |  |
| DT: Der freche Luchs                                |      |                   |                    |         |    |          |      |          |      |  |
| T: Erdbeerinchen Erdbeerfee                         | 2011 | 22 927            | 9.99               | T       | DT | 0.04     | 0.11 | 0.26     | 0.26 |  |
| DT: Die Weiden-Elfe                                 |      |                   |                    |         |    |          |      |          |      |  |
| T: Frederick und seine Mäusefreunde                 | 1967 | 15 777            | 14.90              | T       | DT | 0.23     | 0.06 | 0.27     | 0.16 |  |
| DT: Friedhelm und die Fuchsbande                    |      |                   |                    |         |    |          |      |          |      |  |
| T: Willi Wiberg                                     | 1974 | 7 554             | 12.95              | T       | DT | 0.32     | 0.06 | 0.51     | 0.11 |  |
| DT: Hans Grünhaus                                   |      |                   |                    |         |    |          |      |          |      |  |
| T: Zilly, die Zauberin                              | 1989 | 2 488             | 12.95              | T       | DT | 0.14     | 0.11 | 0.24     | 0.12 |  |

---

DT: Matze, der Magier

*Set 3*

|     |                                                                                   |      |        |       |    |   |      |      |      |      |
|-----|-----------------------------------------------------------------------------------|------|--------|-------|----|---|------|------|------|------|
| T:  | Das kleine Ich bin ich                                                            | 1972 | 25 189 | 14.95 | DT | T | 0.11 | 0.14 | 0.29 | 0.22 |
| DT: | Ich werde immer größer                                                            |      |        |       |    |   |      |      |      |      |
| T:  | Die kleine Hummel Bommel                                                          | 2015 | 2 088  | 12.95 | DT | T | 0.04 | 0.08 | 0.11 | 0.22 |
| DT: | Silas der Schmetterling                                                           |      |        |       |    |   |      |      |      |      |
| T:  | Elmar                                                                             | 1989 | 3 342  | 5.90  | DT | T | 0.00 | 0.28 | 0.11 | 0.28 |
| DT: | Rüdiger das Rhinoceros                                                            |      |        |       |    |   |      |      |      |      |
| T:  | Henriette Bimmelbahn                                                              | 1957 | 4 080  | 4.50  | DT | T | 0.14 | 0.08 | 0.17 | 0.30 |
| DT: | Lotte Lokomotive                                                                  |      |        |       |    |   |      |      |      |      |
| T:  | Lauras Stern                                                                      | 1996 | 2 660  | 12.95 | DT | T | 0.02 | 0.83 | 0.08 | 0.85 |
| DT: | Lone und der Mond                                                                 |      |        |       |    |   |      |      |      |      |
| T:  | Mama Muh                                                                          | 1993 | 12 414 | 12.00 | DT | T | 0.04 | 0.28 | 0.20 | 0.46 |
| DT: | Papa Pferd                                                                        |      |        |       |    |   |      |      |      |      |
| T:  | Na klar, Lotta kann Rad fahren                                                    | 1972 | 1 610  | 12.90 | DT | T | 0.04 | 0.19 | 0.14 | 0.30 |
| DT: | Annes Fahrrad                                                                     |      |        |       |    |   |      |      |      |      |
| T:  | Räuber Hotzenplotz                                                                | 1962 | 1 538  | 11.99 | DT | T | 0.05 | 1.00 | 0.16 | 0.78 |
| DT: | Leon der Langfinger                                                               |      |        |       |    |   |      |      |      |      |
| T:  | Superwurm                                                                         | 2012 | 14 853 | 12.95 | DT | T | 0.09 | 0.06 | 0.19 | 0.30 |
| DT: | Die Riesen-Schildkröte                                                            |      |        |       |    |   |      |      |      |      |
| T:  | Vom kleinen Maulwurf, der wissen<br>wollte, wer ihm auf den Kopf<br>gemacht hatte | 1989 | 1 646  | 5.00  | DT | T | 0.05 | -    | 0.20 | -    |
| DT: | Vom kleinen Seeigel, der wissen<br>wollte, wer ihn gepiekt hatte                  |      |        |       |    |   |      |      |      |      |

---

Anmerkungen: <sup>a</sup>Amazon-Gesamtverkaufsrang, Stand: 27.05.2015. <sup>b</sup>In Euro.
