# Supplementary material for: Der Titelrekognitionstest für das Vorschulalter (TRT-VS)
Source: Atypon-hosted journal article supplement (doi:10.1026/0012-1924/a000186), 2017-09-05
Supplement: 0012-1924_a000186_esm2.pdf [file 0012-1924_a000186_esm2.pdf]

*Elektronisches Supplement 2. Instruktionen für Erwachsene und Kinder des Titelrekognitionstests für das Vorschulalter (TRT-VS)*

*Tabelle 1. TRT-VS: Instruktion für Erwachsene*

„Im Folgenden sehen Sie eine Liste mit den Titeln von 30 Bilderbüchern. Manche Titel beziehen sich auf populäre Kinderbücher, andere Titel sind frei erfunden. Bitte lesen Sie sich die Liste durch und kreuzen Sie an, welche Titel Ihr Kind nach Ihrer Einschätzung kennt. Bitte raten Sie nicht — kreuzen Sie nur die Titel an, die Ihrem Kind bekannt sind. Entscheiden Sie sich bitte spontan und ohne Hilfsmittel zu benutzen oder Ihr Kind zu fragen.“

*Tabelle 2. TRT-VS: Instruktion für Kinder*

„Du hörst gleich die Namen von einigen Büchern. Einige Buchnamen gibt es wirklich, andere sind erfunden. Hör genau hin, wie jeder einzelne Name heißt. Wenn du den Namen von dem Buch kennst, dann drücke auf die grüne Taste. Wenn du den Buchnamen nicht kennst, dann drücke auf die rote Taste. Rate nicht, sondern drücke nur dann die grüne Taste, wenn du den Buchnamen wirklich kennst. Vergiss nicht, dass einige Namen erfunden sind. Raten kann deswegen leicht erkannt werden.“
